# Supplementary material for: Oxidation of 3,5-di-tert-butylcatechol and 2-aminophenol by molecular oxygen catalyzed by an organocatalyst
Source: Royal Society of Chemistry journal article supplement (doi:10.1039/c5nj01405k), 2015-01-01
Supplement: c5nj01405k1.pdf [file c5nj01405k1.pdf]

## Supplementary Material to the Paper

### Oxidation of 3,5-di-*tert*-butylcatechol and 2-aminophenol by molecular oxygen catalyzed by an organocatalyst†

Gábor Székely, Nárcisz Bagi, József Kaizer\* and Gábor Speier\*

| List of content:                                                                                                            | Page |
|-----------------------------------------------------------------------------------------------------------------------------|------|
| <b>SFigure 1.</b> The catalytic oxidation of OAPH <sub>3</sub> followed by UV-vis spectroscopy                              | S2   |
| <b>SFigure 2.</b> Plot of oxidation of DTBCH <sub>2</sub> versus dioxygen concentration                                     | S3   |
| <b>SFigure 3.</b> Plot of oxidation of OAPH <sub>3</sub> versus dioxygen concentration                                      | S4   |
| <b>SFigure 4.</b> The dependence of reaction rate of the oxidation of DTBCH <sub>2</sub> on the catalyst concentration      | S5   |
| <b>SFigure 5.</b> The dependence of reaction rate of the oxidation of OAPH <sub>3</sub> on the catalyst concentration       | S6   |
| <b>SFigure 6.</b> Time course of the oxidation of OAPH <sub>3</sub>                                                         | S7   |
| <b>SFigure 7.</b> Rate dependence of the oxidation of DTBCH <sub>2</sub> on the initial concentration of DTBCH <sub>2</sub> | S8   |
| <b>SFigure 8.</b> Rate dependence of the oxidation of OAPH <sub>3</sub> on the initial concentration of OAPH <sub>3</sub>   | S9   |
| <b>SFigure 9.</b> The Arrhenius plot on the oxidation of DTBCH <sub>2</sub>                                                 | S10  |
| <b>SFigure 10.</b> The Arrhenius plot on the oxidation of OAPH <sub>3</sub>                                                 | S11  |
| <b>SFigure 11.</b> The Kinetic Isotope Effect of DTBCH <sub>2</sub>                                                         | S12  |
| <b>SFigure 12.</b> The Kinetic Isotope Effect of OAPH <sub>3</sub>                                                          | S13  |
| <b>STable 1.</b> The kinetic data of the catalytic oxidation of DTBCH <sub>2</sub>                                          | S14  |
| <b>STable 2.</b> The kinetic data of the catalytic oxidation of OAPH <sub>3</sub>                                           | S15  |
| <b>Experiments details</b>                                                                                                  | S16  |
| <b>SFigure 13.</b> <sup>1</sup> H NMR spectrum of 3,5-di- <i>tert</i> -butylquinone.                                        | S17  |
| <b>SFigure 14.</b> <sup>13</sup> C NMR spectrum of 3,5-di- <i>tert</i> -butylquinone.                                       | S18  |
| <b>SFigure 15.</b> <sup>1</sup> H NMR spectrum of 2-aminophenoxazin-3-one.                                                  | S19  |
| <b>SFigure 16.</b> <sup>13</sup> C NMR spectrum of 2-aminophenoxazin-3-one.                                                 | S20  |
| <b>SFigure 17.</b> Mass spectrum of 3,5-di- <i>tert</i> -butylquinone.                                                      | S21  |
| <b>SFigure 18.</b> Mass spectrum of 2-aminophenoxazine-3-one.                                                               | S22  |

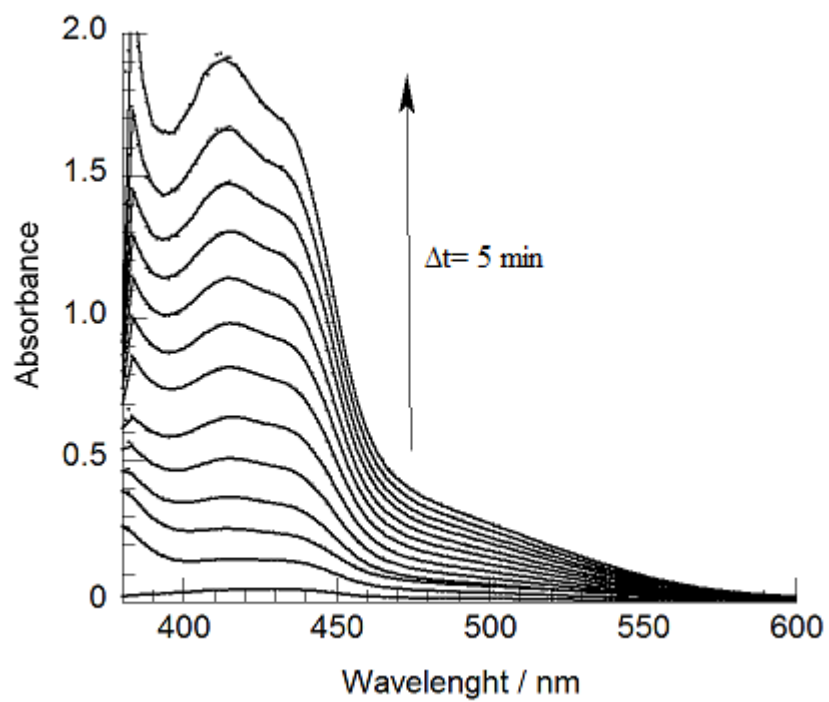

**Figure 1.** The catalytic oxidation of OAPH<sub>3</sub> followed by UV-vis spectroscopy. [OAPH<sub>3</sub>] =  $11.25 \times 10^{-2}$  M, [1,3,2-oxazaphosphole] =  $1.25 \times 10^{-3}$  M, [O<sub>2</sub>] =  $9.5 \times 10^{-3}$  M, T = 298.15 K, 20 mL MeOH.

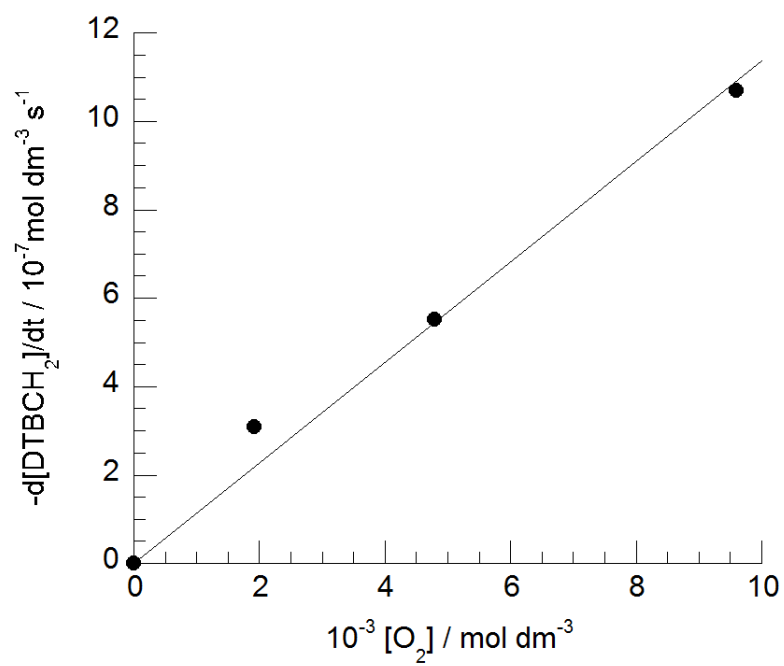

**Figure 2.** Plot of oxidation of DTBCH<sub>2</sub> versus dioxygen concentration. [DTBCH<sub>2</sub>] =  $12.5 \times 10^{-2}$  M, [1,3,2-oxazaphosphole] =  $1.25 \times 10^{-3}$  M, T = 298.15 K, 10 mL MeOH.

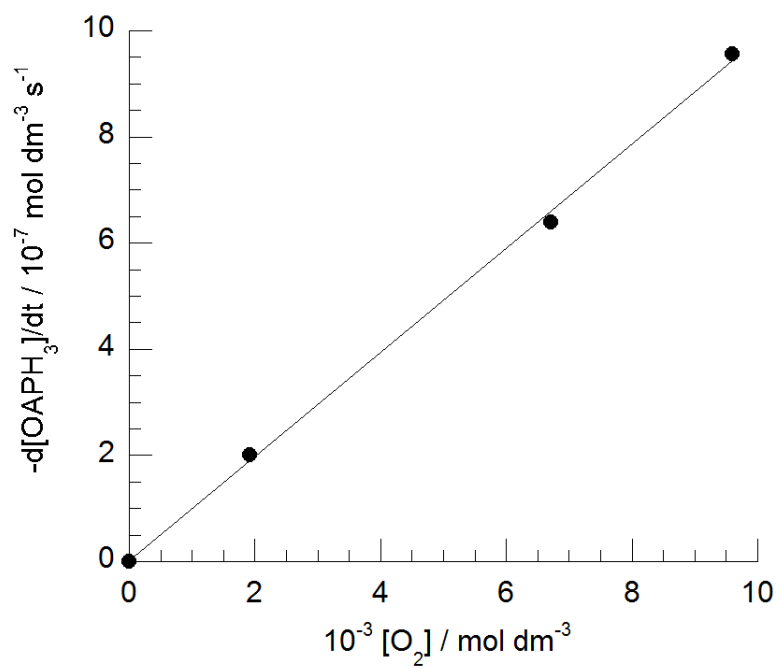

**Figure 3.** Plot of oxidation of OAPH<sub>3</sub> versus dioxygen concentration. [OAPH<sub>3</sub>] =  $12.5 \times 10^{-2}$  M, [1,3,2-oxazaphosphole] =  $1.25 \times 10^{-3}$  M, T = 298.15 K, 20 mL MeOH.

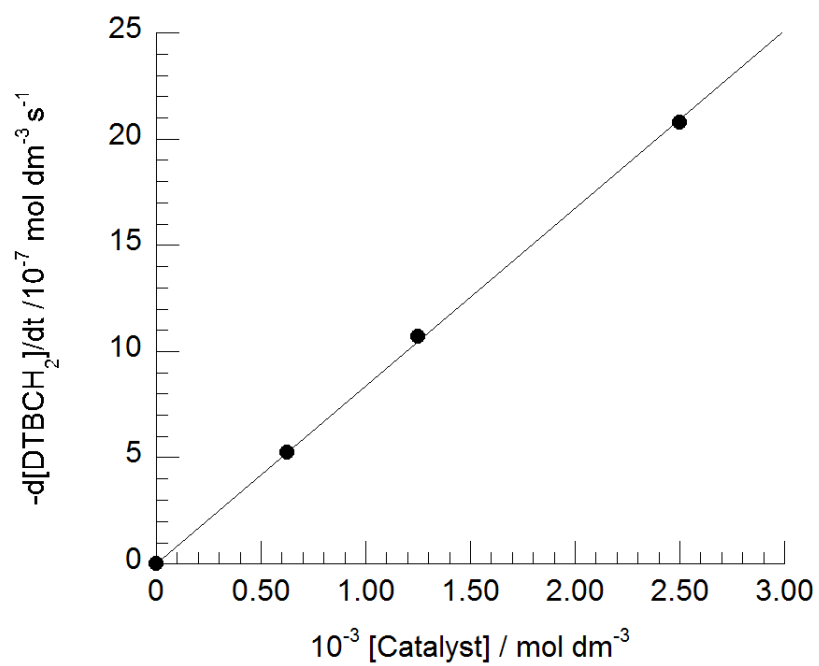

**Figure 4.** The dependence of reaction rate of the oxidation of DTBCH<sub>2</sub> on the catalyst concentration. [DTBCH<sub>2</sub>] = 12.5 × 10<sup>-2</sup> M, [O<sub>2</sub>] = 9.5 × 10<sup>-3</sup> M, T = 298.15 K, 10 mL MeOH.

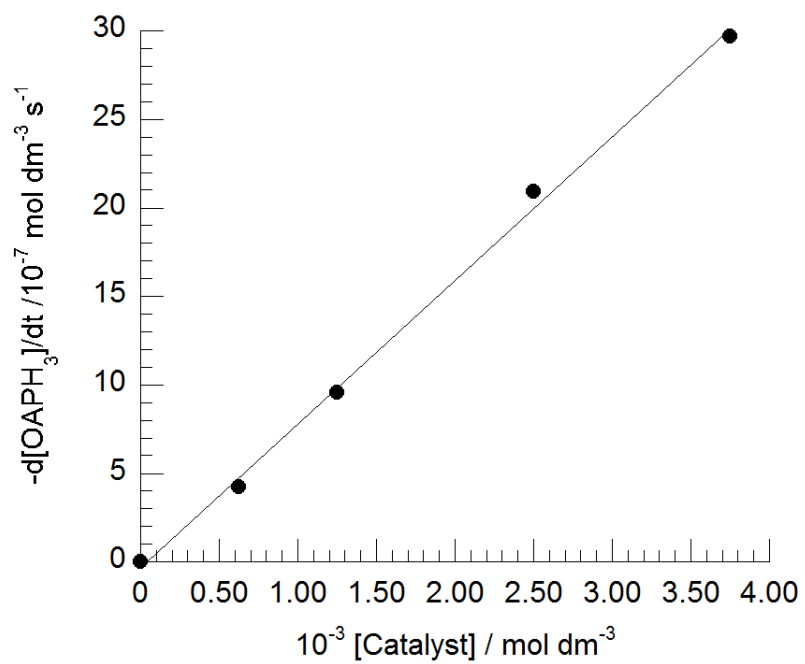

**Figure 5.** The dependence of reaction rate of the oxidation of OAPH<sub>3</sub> on the catalyst concentration. [OAPH<sub>3</sub>] = 12.5 × 10<sup>-2</sup> M, [O<sub>2</sub>] = 9.5 × 10<sup>-3</sup> M, T = 298.15 K, 20 mL MeOH.

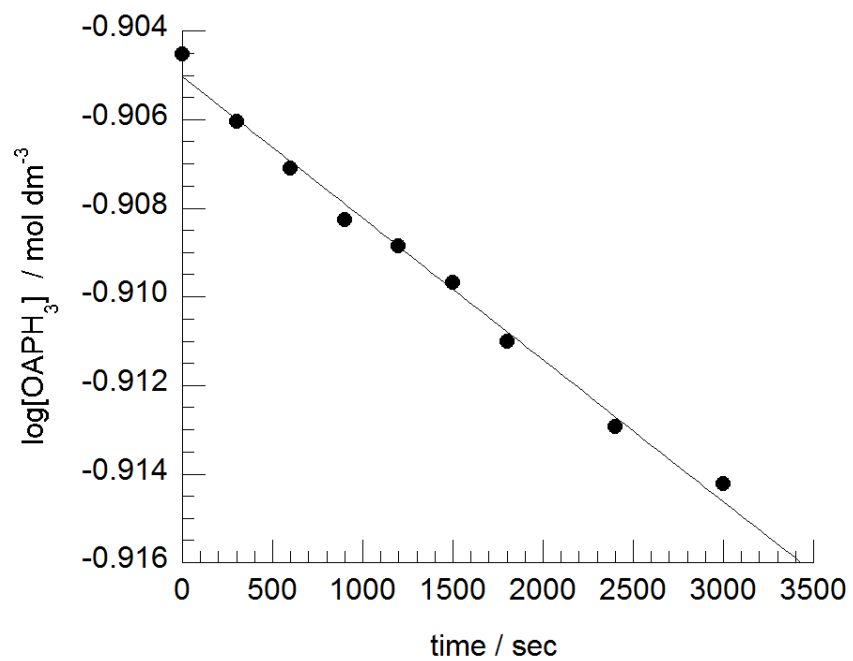

**Figure 6.** Time course of the oxidation of OAPH<sub>3</sub>. [OAPH<sub>3</sub>] =  $12.5 \times 10^{-2}$  M, [1,3,2-oxazaphosphole] =  $1.25 \times 10^{-3}$ , [O<sub>2</sub>] =  $9.5 \times 10^{-3}$  M, T = 298.15 K, 20 mL MeOH.

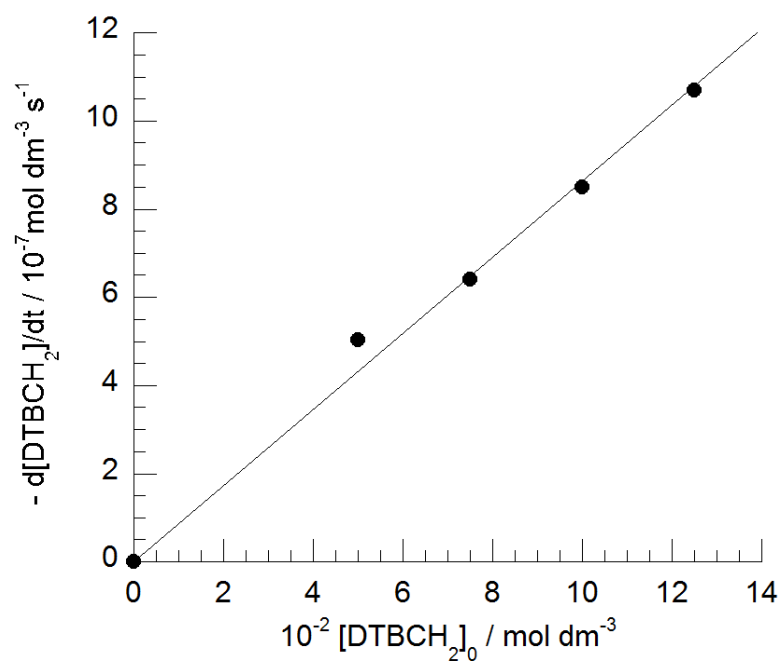

**Figure 7.** Rate dependence of the oxidation of DTBCH<sub>2</sub> on the initial concentration of DTBCH<sub>2</sub>. [1,3,2-oxazaphosphole] =  $1.25 \times 10^{-3}$  M, [O<sub>2</sub>] =  $9.5 \times 10^{-3}$  M, T = 298.15 K, 10 mL MeOH.



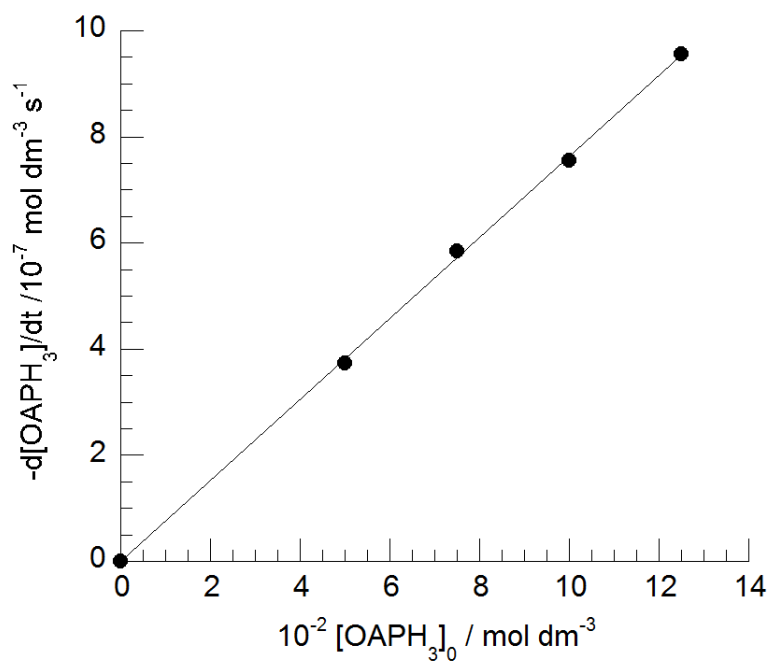

**Figure 8.** Rate dependence of the oxidation of OAPH<sub>3</sub> on the initial concentration of OAPH<sub>3</sub>. [1,3,2-oxazaphosphole] =  $1.25 \times 10^{-3}$  M, [O<sub>2</sub>] =  $9.5 \times 10^{-3}$  M, T = 298.15 K, 20 mL MeOH.

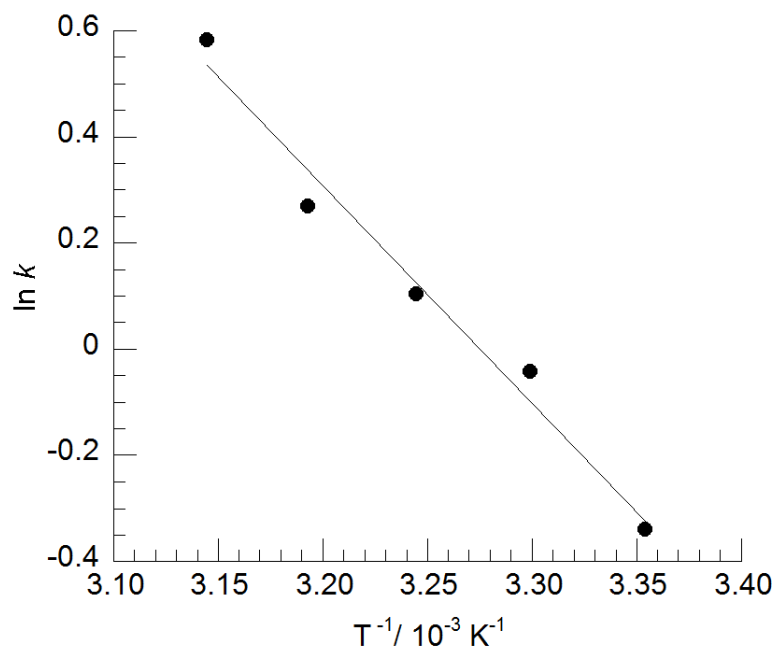

**Figure 9.** The Arrhenius plot on the oxidation of DTBCH<sub>2</sub>.

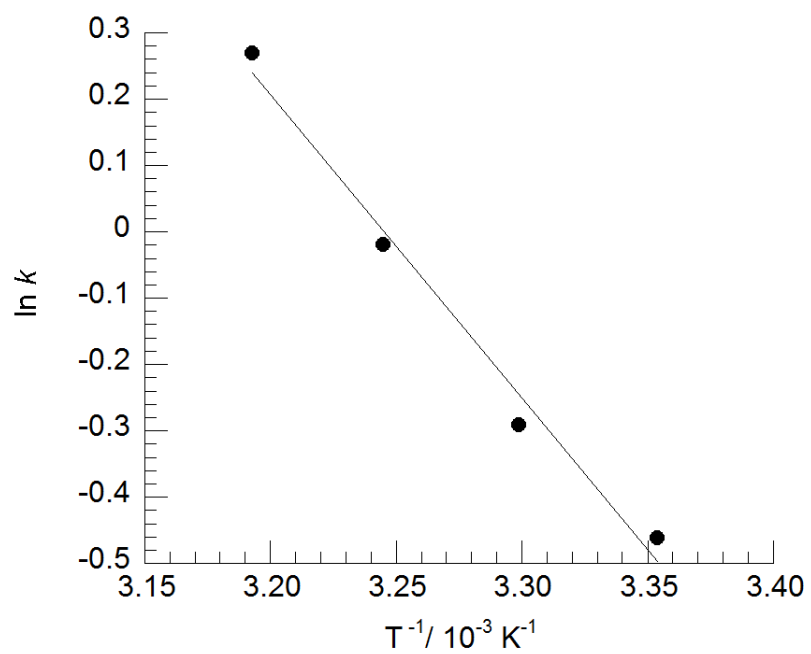

**Figure 10.** The Arrhenius plot on the oxidation of OAPH<sub>3</sub>.

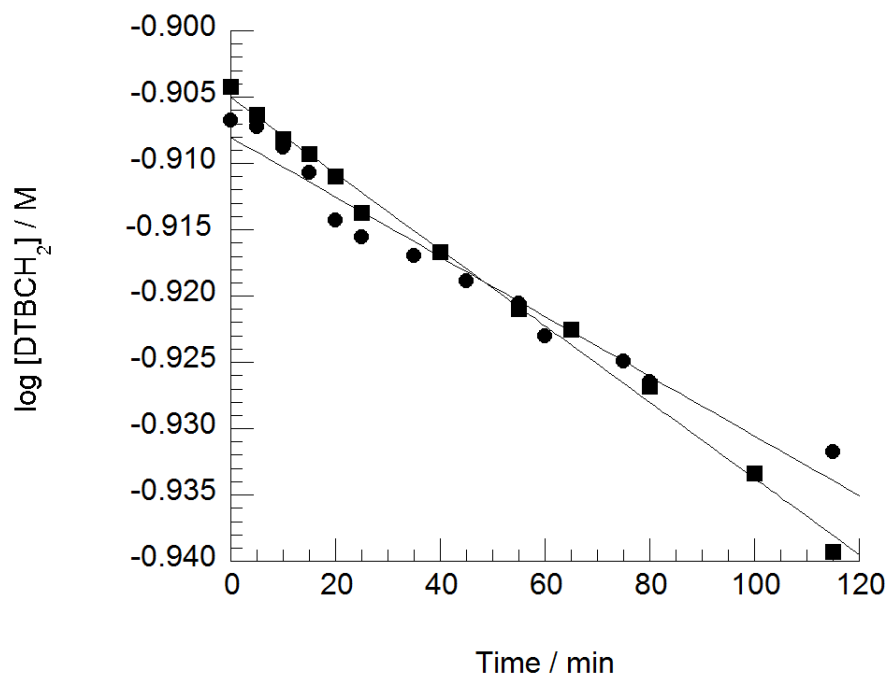

**SFigure 11.** The Kinetic Isotope Effect data of DTBCH<sub>2</sub>.

(■ in MeOH, ● in MeOD)

[DTBCH<sub>2</sub>] =  $12.5 \times 10^{-2}$  M, [1,3,2-oxazaphosphole] =  $1.25 \times 10^{-3}$ , [O<sub>2</sub>] =  $9.5 \times 10^{-3}$  M,  
T = 298.15 K, 10 mL MeOD/MeOH.

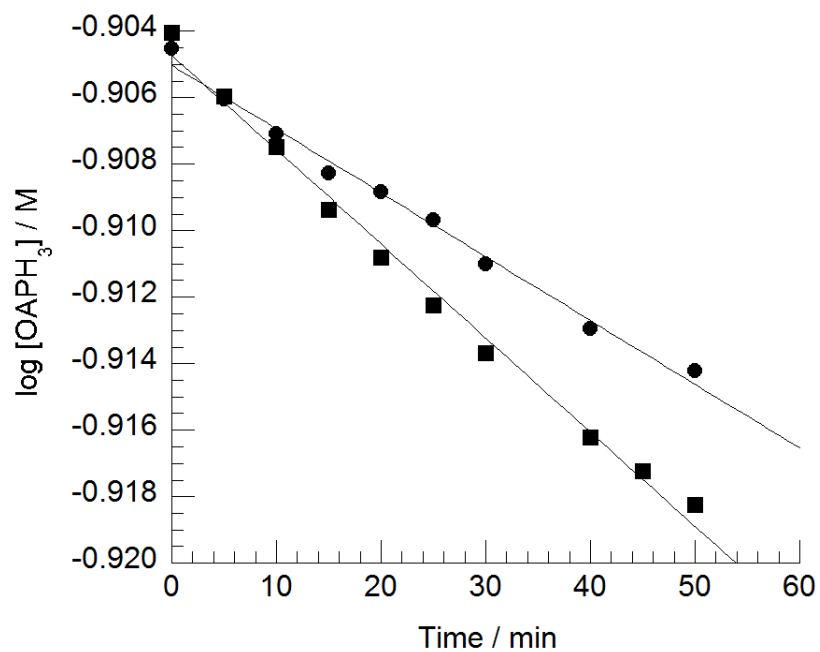

**SFigure 12.** The Kinetic Isotope Effect data of OAPH<sub>3</sub>.

(■ in MeOH, ● in MeOD)

[OAPH<sub>3</sub>] =  $12.5 \times 10^{-2}$  M, [1,3,2-oxazaphosphole] =  $1.25 \times 10^{-3}$ , [O<sub>2</sub>] =  $9.5 \times 10^{-3}$  M,  
T = 298.15 K, 20 mL MeOD/MeOH.

**STable 1.** The kinetic data of the catalytic oxidation of DTBCH<sub>2</sub>.

| Entry | Temp.<br>(°C) | [O <sub>2</sub> ]<br>(10 <sup>-3</sup> mol dm <sup>-3</sup> ) | [1,3,2-oxazaphosphole]<br>(10 <sup>-3</sup> mol dm <sup>-3</sup> ) | [DTBCH <sub>2</sub> ]<br>(10 <sup>-2</sup> mol dm <sup>-3</sup> ) | -d[DTBCH <sub>2</sub> ]/dt<br>(10 <sup>-7</sup> Ms <sup>-1</sup> ) | <i>k</i> <sub>obs</sub><br>(M <sup>-2</sup> s <sup>-1</sup> ) |
|-------|---------------|---------------------------------------------------------------|--------------------------------------------------------------------|-------------------------------------------------------------------|--------------------------------------------------------------------|---------------------------------------------------------------|
| 1.    | 25            | 9.50                                                          | 1.25                                                               | 5.00                                                              | 5.02 ± 0.30                                                        | 0.84±0.08                                                     |
| 2.    | 25            | 9.50                                                          | 1.25                                                               | 7.50                                                              | 6.41 ± 0.17                                                        | 0.71±0.09                                                     |
| 3.    | 25            | 9.50                                                          | 1.25                                                               | 10.00                                                             | 8.49 ± 0.03                                                        | 0.70±0.09                                                     |
| 4.    | 25            | 9.50                                                          | 1.25                                                               | 12.50                                                             | 10.69 ±0.24                                                        | 0.71±0.09                                                     |
| 5.    | 25            | 9.50                                                          | 0.625                                                              | 12.50                                                             | 5.25 ± 0.27                                                        | 0.70±0.09                                                     |
| 6.    | 25            | 9.50                                                          | 2.500                                                              | 12.50                                                             | 20.80 ± 0.24                                                       | 0.69±0.09                                                     |
| 7. *  | 25            | 1.92                                                          | 1.25                                                               | 12.50                                                             | 3.08 ± 0.12                                                        | 1.03±0.10                                                     |
| 8.    | 25            | 4.80                                                          | 1.25                                                               | 12.50                                                             | 5.52 ± 0.25                                                        | 0.74±0.09                                                     |
|       |               |                                                               |                                                                    |                                                                   |                                                                    | <b>avg.:0.76±0.11</b>                                         |
| 9.    | 30            | 9.48                                                          | 1.25                                                               | 12.50                                                             | 14.20 ± 0.57                                                       | 0.96±0.10                                                     |
| 10.   | 35            | 9.46                                                          | 1.25                                                               | 12.50                                                             | 16.40 ± 0.78                                                       | 1.11±0.11                                                     |
| 11.   | 40            | 9.44                                                          | 1.25                                                               | 12.50                                                             | 19.32 ± 1.07                                                       | 1.31±0.11                                                     |
| 12.   | 45            | 9.42                                                          | 1.25                                                               | 12.50                                                             | 24.40 ± 1.55                                                       | 1.79±0.11                                                     |
| 13.   | 25            | 9.50                                                          | 1.25                                                               | 12.50                                                             | 10.20 ± 0.22                                                       | 0.69±0.09                                                     |

Mean value of the kinetic constant *k*<sub>obs</sub> and its standard deviations  $\sigma(k_{\text{obs}})$  were calculated as

$$k_{\text{obs}} = (\sum_i w_i k_i / \sum_i w_i) \text{ and } \sigma(k_{\text{obs}}) = (\sum_i w_i (k_i - k_{\text{obs}})^2 / (n-1) \sum_i w_i)^{1/2}, \text{ where } w_i = 1/\sigma_i^2$$

\* Under air

13. in MeOD

**STable 2.** The kinetic data of the catalytic oxidation of OAPH<sub>3</sub>.

| Entry | Temp.<br>(°C) | [O <sub>2</sub> ]<br>(10 <sup>-3</sup> mol dm <sup>-3</sup> ) | [1,3,2-oxazaphosphole]<br>(10 <sup>-3</sup> mol dm <sup>-3</sup> ) | [OAPH <sub>3</sub> ]<br>(10 <sup>-2</sup> mol dm <sup>-3</sup> ) | d[OAPH <sub>3</sub> ]/dt<br>(10 <sup>-7</sup> Ms <sup>-1</sup> ) | <i>k</i> <sub>obs</sub><br>(M <sup>-2</sup> s <sup>-1</sup> ) |
|-------|---------------|---------------------------------------------------------------|--------------------------------------------------------------------|------------------------------------------------------------------|------------------------------------------------------------------|---------------------------------------------------------------|
| 1.    | 25            | 9.50                                                          | 1.25                                                               | 5.00                                                             | 3.73 ± 0.25                                                      | 0.61±0.03                                                     |
| 2.    | 25            | 9.50                                                          | 1.25                                                               | 7.50                                                             | 5.85 ± 0.18                                                      | 0.63±0.03                                                     |
| 3.    | 25            | 9.50                                                          | 1.25                                                               | 10.00                                                            | 7.56 ± 0.12                                                      | 0.62±0.03                                                     |
| 4.    | 25            | 9.50                                                          | 1.25                                                               | 12.50                                                            | 9.56 ± 0.10                                                      | 0.62±0.03                                                     |
| 5.    | 25            | 9.50                                                          | 0.63                                                               | 12.50                                                            | 4.26 ± 0.23                                                      | 0.55±0.03                                                     |
| 6.    | 25            | 9.50                                                          | 2.50                                                               | 12.50                                                            | 20.90 ± 0.35                                                     | 0.68±0.04                                                     |
| 7.    | 25            | 9.50                                                          | 3.75                                                               | 12.50                                                            | 29.70 ± 0.65                                                     | 0.65±0.04                                                     |
| 8. *  | 25            | 1.92                                                          | 1.25                                                               | 12.50                                                            | 2.00 ± 0.32                                                      | 0.65±0.04                                                     |
| 9.    | 25            | 6.72                                                          | 1.25                                                               | 12.50                                                            | 6.40 ± 0.16                                                      | 0.59±0.03                                                     |
|       |               |                                                               |                                                                    |                                                                  |                                                                  | <b>avg.:0.62±0.03</b>                                         |
| 10.   | 25            | 9.50                                                          | 1.25                                                               | 12.50                                                            | 9.56 ± 0.10                                                      | 0.62±0.03                                                     |
| 11.   | 30            | 9.48                                                          | 1.25                                                               | 12.50                                                            | 11.25 ± 0.10                                                     | 0.75±0.03                                                     |
| 12.   | 35            | 9.46                                                          | 1.25                                                               | 12.50                                                            | 14.70 ± 0.13                                                     | 0.98±0.04                                                     |
| 13.   | 40            | 9.44                                                          | 1.25                                                               | 12.50                                                            | 19.50 ± 0.29                                                     | 1.31±0.04                                                     |
| 14.   | 25            | 9.50                                                          | 1.25                                                               | 12.50                                                            | 6.53 ± 0.10                                                      | 0.44±0.02                                                     |

Mean value of the kinetic constant *k*<sub>obs</sub> and its standard deviations  $\sigma(k_{\text{obs}})$  were calculated as

$$k_{\text{obs}} = (\sum_i w_i k_i / \sum_i w_i) \text{ and } \sigma(k_{\text{obs}}) = (\sum_i w_i (k_i - k_2)^2 / (n-1) \sum_i w_i)^{1/2}, \text{ where } w_i = 1/\sigma_i^2$$

\* Under air

14. in MeOD

## Experiments details

**Instruments:** Gas chromatographic – Mass Spectrometric (GC-MS) analyses were carried out on a GCMS-QP2010 SE instrument with secondary electron multiplier detector. NMR spectrum:  $^1\text{H}$  and  $^{13}\text{C}$  NMR spectra were collected on 400 MHz NMR spectrometers (Bruker Avance) using DMSO-d<sub>6</sub> and  $\text{CDCl}_3$  as solvent. Chemical shifts are reported in parts per million (ppm). Chemical shifts for protons are reported in parts per million downfield and are referenced to residual protium in the NMR solvent ( $\delta$  (DMSO-d<sub>6</sub>) = 2.50, 39.52 and  $\delta$ ( $\text{CDCl}_3$ ) = 7.24, 77)).



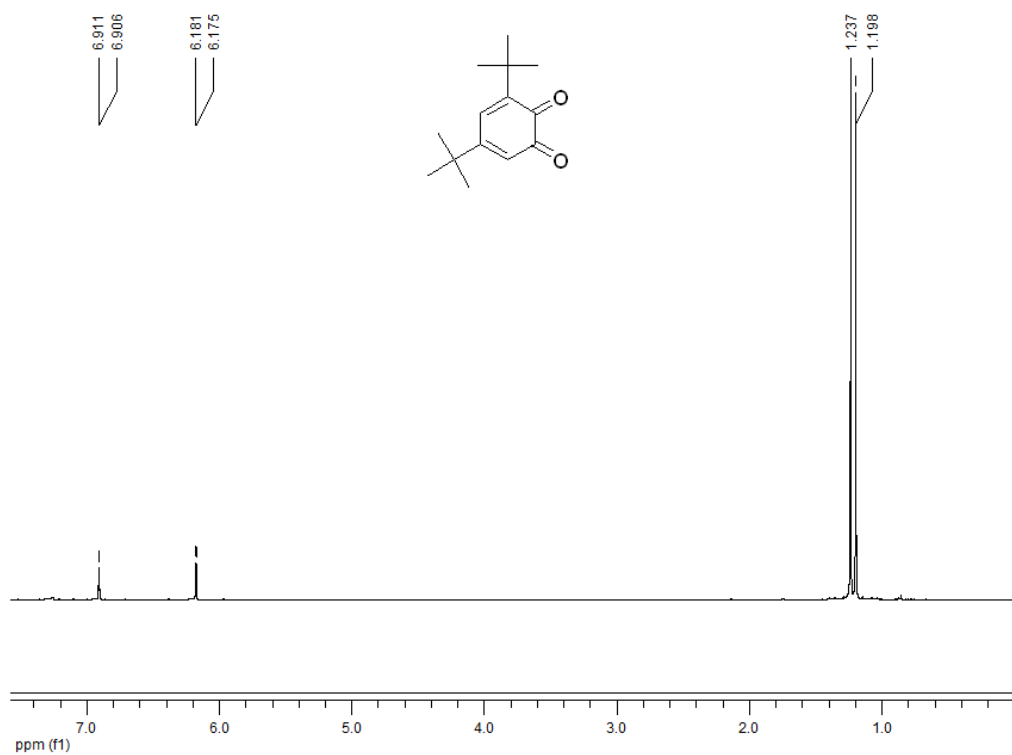

**Figure 13.** <sup>1</sup>H NMR spectrum of 3,5-di-*tert*-butylquinone.

(Uyanik, M.; Mutsuga, T.; Ishihara, K. *Molecules* **2012**, *17*, 8604-8616.)

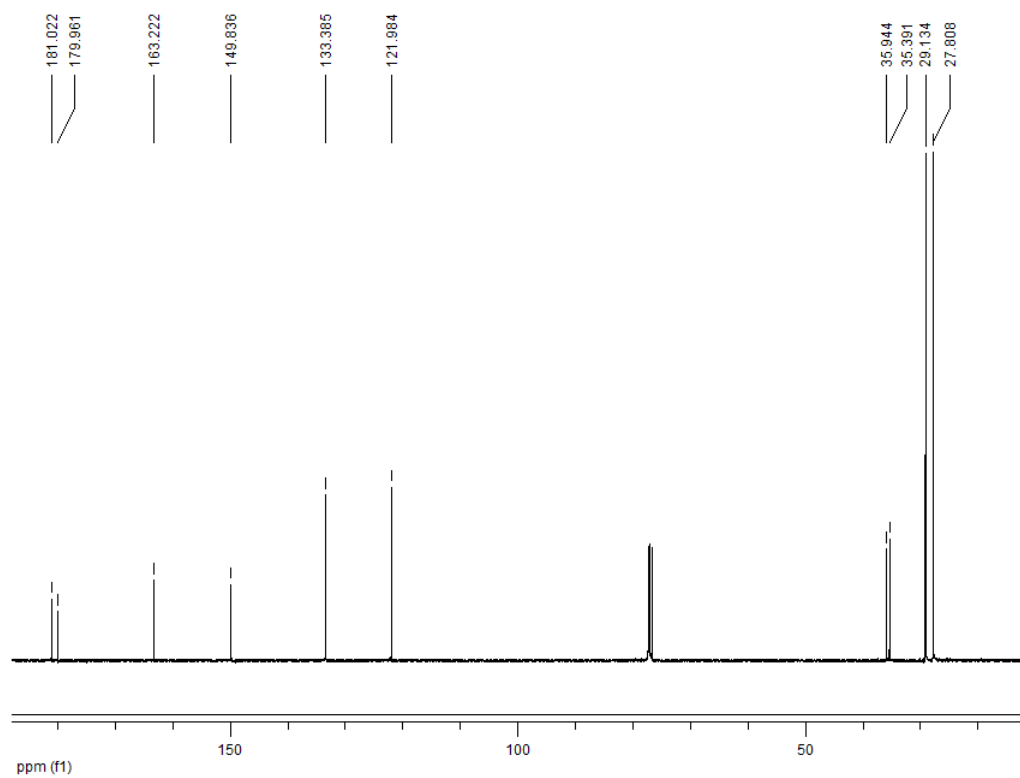

**Figure 14.**  $^{13}\text{C}$  NMR spectrum of 3,5-di-*tert*-butylquinone.

(Uyanik, M.; Mutsuga, T.; Ishihara, K. *Molecules* **2012**, *17*, 8604-8616.)

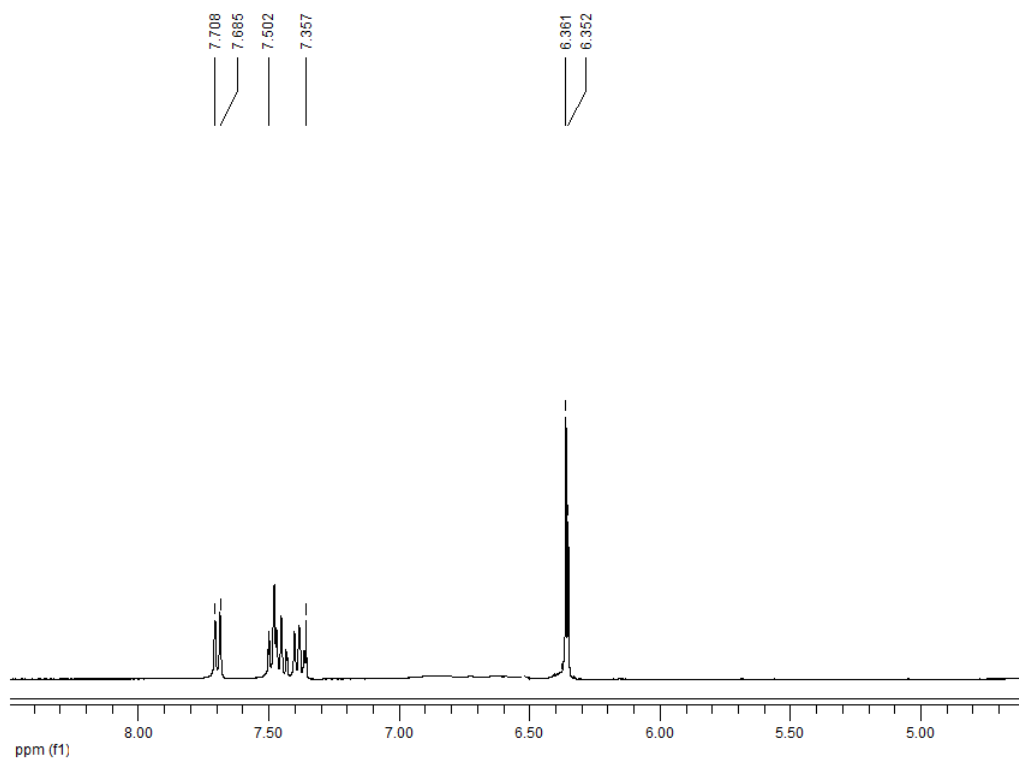

**Figure 15.** <sup>1</sup>H NMR spectrum of 2-aminophenoxazine-3-one.

(Suzuki, H., Furusko, Y., Higashi, T. Ohnishi, Y., Horinouchi, S. *J. Biol. Chem.* **2006**, *2*, 824-833.)

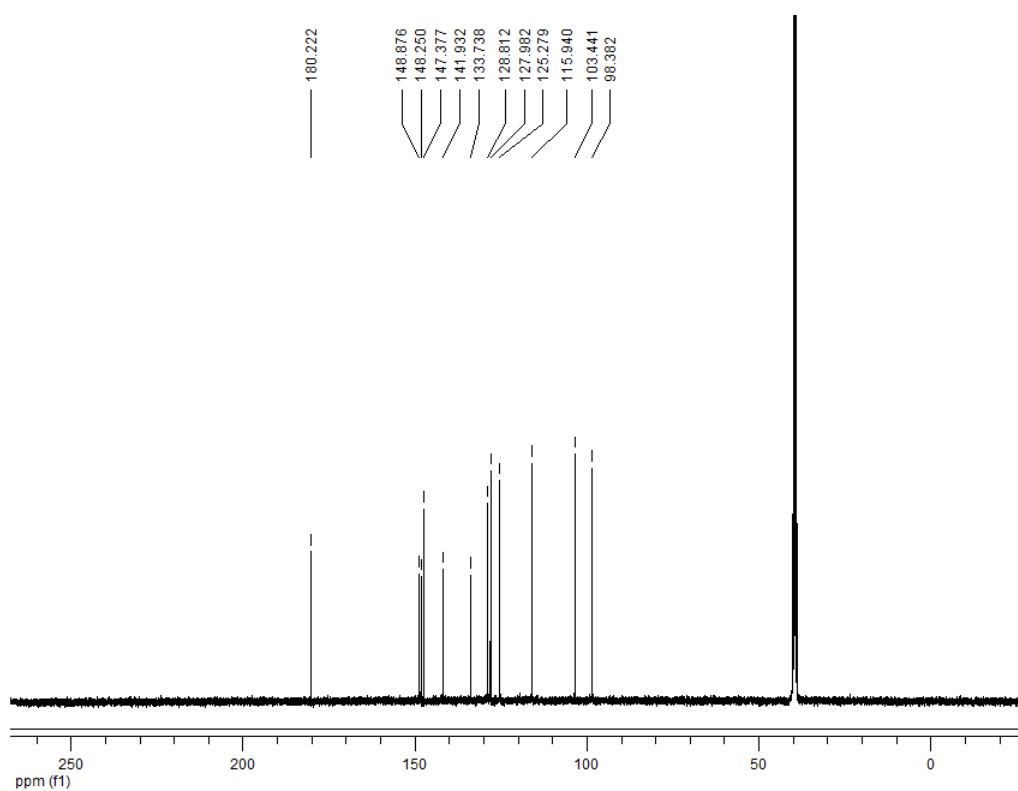

**SFigure 16.**  $^{13}\text{C}$  NMR spectrum of 2-aminophenoxazine-3-one.

(Suzuki, H., Furusko, Y., Higashi, T. Ohnishi, Y., Horinouchi, S. *J. Biol. Chem.* **2006**, *2*, 824-833.)

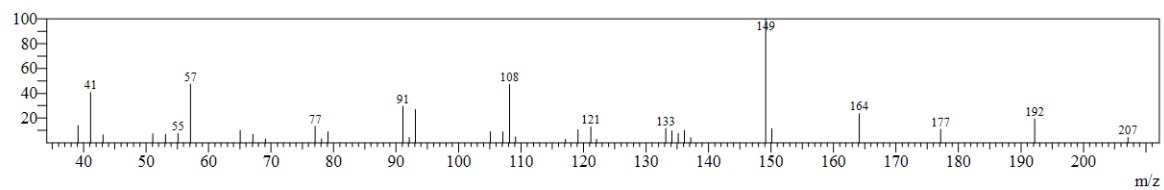

**Figure 17.** Mass spectrum of 3,5-di-*tert*-butylquinone.

([http://sdbs.db.aist.go.jp/sdbs/cgi-bin/direct\\_frame\\_top.cgi](http://sdbs.db.aist.go.jp/sdbs/cgi-bin/direct_frame_top.cgi))

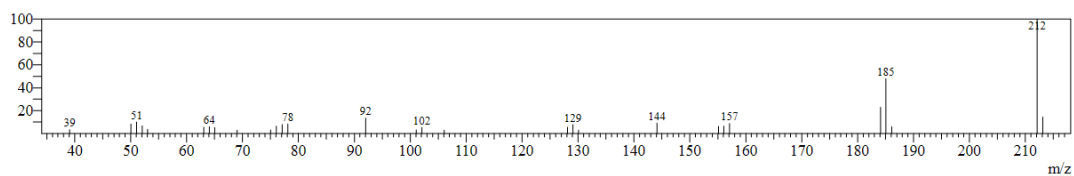

**Figure 18.** Mass spectrum of 2-aminophenoxazine-3-one.

(Friebe, A., Vilich, V., Hennig L., Kluge M., Sicker D. *Appl Environ Microbiol.* **1998**, *64*(7), 2386–2391.)
